# Supplementary material for: Modeling the aging process of black carbon during atmospheric transport using a new approach: a case study in Beijing
Source: Copernicus journal article supplement (doi:10.5194/acp-2019-106), 2019-04-01
Supplement: Supplementary file 1 [file acp-2019-106-supplement.pdf]

1 *Supplement of*

2 **Modeling the aging process of black carbon during**  
3 **atmospheric transport using a new approach: a case**  
4 **study in Beijing**

5 Yuxuan Zhang<sup>1,2</sup>, Meng Li<sup>2</sup>, Yafang Cheng<sup>2</sup>, Guannan Geng<sup>3</sup>, Chaopeng Hong<sup>4</sup>,  
6 Haiyan Li<sup>1</sup>, Xin Li<sup>1</sup>, Dan Tong<sup>4</sup>, Nana Wu<sup>1</sup>, Xin Zhang<sup>1</sup>, Bo Zheng<sup>5</sup>, Yixuan Zheng<sup>6</sup>,  
7 Yu Bo<sup>1,7</sup>, Hang Su<sup>2</sup>, and Qiang Zhang<sup>1</sup>

8 <sup>1</sup>Department of Earth System Science, Tsinghua University, Beijing 100084, China

9 <sup>2</sup>Multiphase Chemistry Department, Max Planck Institute for Chemistry, Mainz 55128, Germany

10 <sup>3</sup>Department of Environmental Health, Rollins School of Public Health, Emory University, Atlanta,  
11 Georgia 30322, USA

12 <sup>3</sup>Department of Earth System Science, University of California, Irvine, California 92697, USA

13 <sup>3</sup>Laboratoire des Sciences du Climat et de l'Environnement LSCE, Batiment 706, Pte 25, Orme de  
14 Merisiers 91191 Gif-sur-Yvette, France

15 <sup>6</sup>Department of Global Ecology, Carnegie Institution for Science, CA, 94305, USA

16 <sup>7</sup>RCE-TEA, Institute of Atmospheric Physics, Chinese Academy of Science, Beijing, 100029, China

17 *Correspondence to:* Qiang Zhang ([qiangzhang@tsinghua.edu.cn](mailto:qiangzhang@tsinghua.edu.cn)) and Yu Bo ([boyu@mail.iap.ac.cn](mailto:boyu@mail.iap.ac.cn))

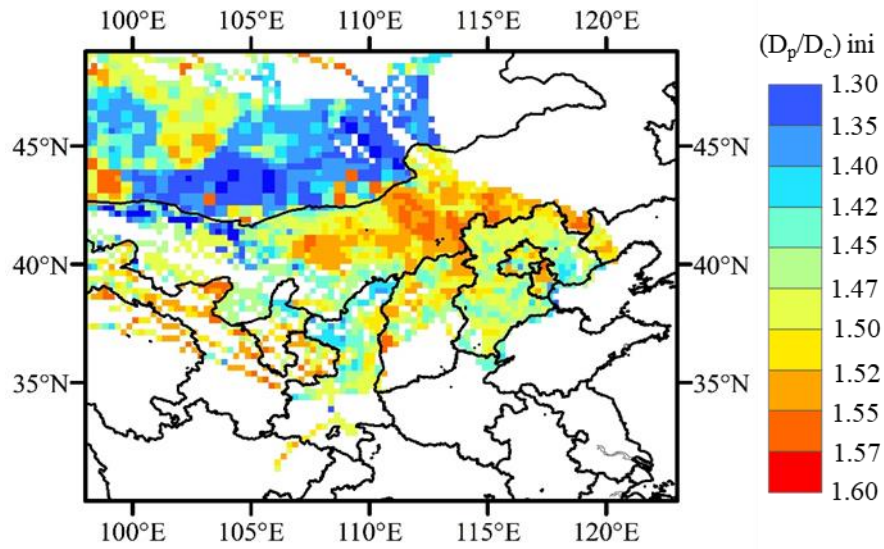

1

2 Figure S1. The  $(D_p/D_c)_{ini}$  of BC particles at emission origins ( $0.25^\circ \times 0.25^\circ$ ) during the  
 3 BJNOV2014 campaign period.
